# Supplementary material for: Quantitative analyses reveal extracellular dynamics of Wnt ligands in Xenopus embryos
Source: eLife journal article supplement (doi:10.7554/elife.55108), 2021-04-27

Figure 3-Figure Supplement 1 (Mii et al.)

**A**

|            |                                            | mV-Wnt8<br>250 pg | sec-mV<br>250 pg | mV-Wnt8<br>20 pg  | mV-Frzb<br>20 pg | mV-Wnt8/<br>HepIII- | mV-Wnt8/<br>HepIII+ | sec-mV/<br>HepIII- | sec-mV/<br>HepIII+ |
|------------|--------------------------------------------|-------------------|------------------|-------------------|------------------|---------------------|---------------------|--------------------|--------------------|
| averaged   | AIC (1 component model)                    | -785              | -791             | -934              | -922             | -906                | -837                | -929               | -838               |
| data       | AIC (2 components model)                   | -1012             | -946             | -1199             | -1234            | -1148               | -1158               | -1179              | -1138              |
|            | number of embryos (N)/<br>measurements (n) | N = 2,<br>n = 22  | N = 3,<br>n = 37 | N = 8,<br>n = 126 | N = 8,<br>n = 87 | N = 3,<br>n = 84    | N = 3,<br>n = 96    | N = 4,<br>n = 56   | N = 4,<br>n = 87   |
| individual | 1-component better                         | 4                 | 8                | 40                | 12               | 18                  | 10                  | 7                  | 17                 |
| data       | 2-component better                         | 18                | 29               | 86                | 75               | 66                  | 87                  | 49                 | 70                 |

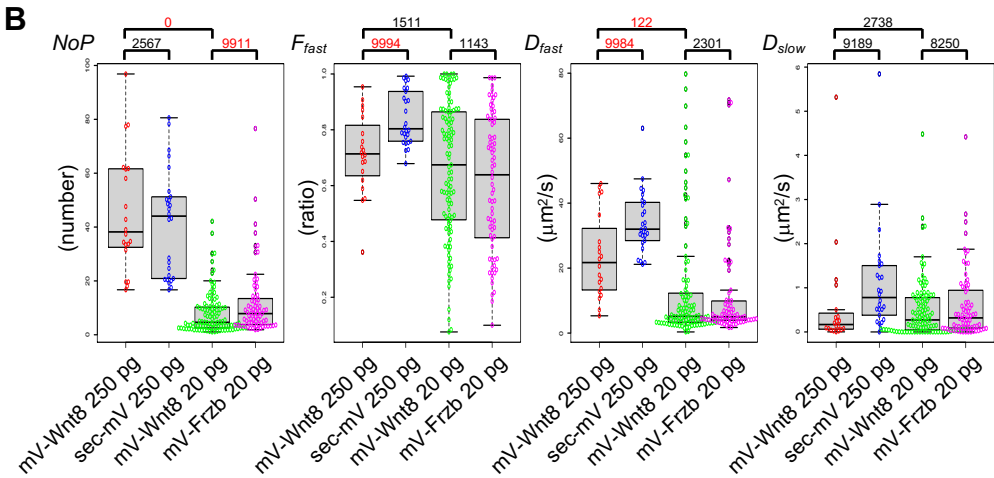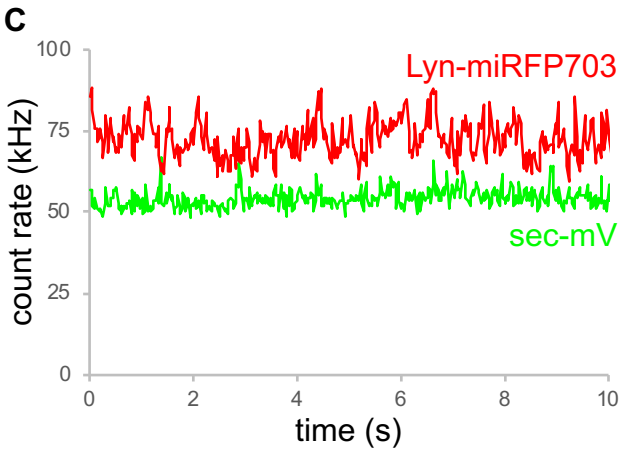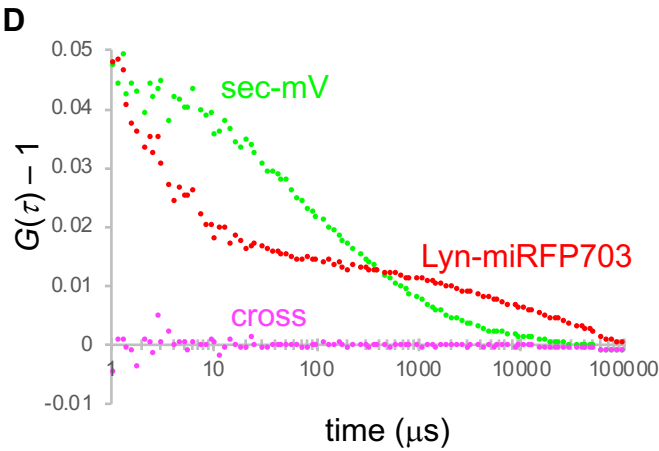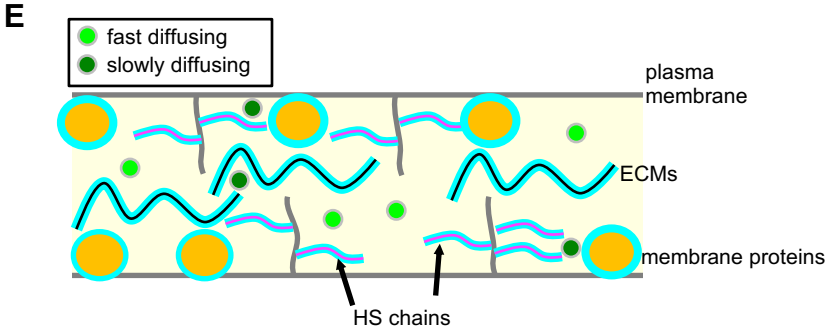

Supplement: supp [file elife-55108-supp-v1.zip]
