# Supplementary material for: Quantitative analyses reveal extracellular dynamics of Wnt ligands in Xenopus embryos
Source: eLife. 2021 Apr 27;10:e55108. doi: 10.7554/eLife.55108 (PMC8139832; doi:10.7554/eLife.55108)
Supplement: Supplementary file 1. — See the section of ‘cDNA cloning of IgG from cultured hybridomas’ in Materials and methods for details. [file elife-55108-supp1.xlsx]

## Sheet: Sheet1
Supplementary File 1. Primers used for molecular cloning of IgG cDNAs from hybridomas.
primer name	sequence (5' to 3')	gene	note	reference [Genbank accetion number]
5' g-F	cgggatccSARGTNMAGCTGSAGSAGTC	Ig g	degenerate primer at variable region	Wang et al. (2000)
g2b-const-R	AGGGGCCAGTGGATAGACTGATGG	Ig g2b	for initial degenerate PCR	this study [J00461]
g1-const-R	ATAGACAGATGGGGGTGTCGTTTTGGC	Ig g1	for initial degenerate PCR	this study [L35037]
3' g2b-R	cggaattcTCATTTACCCGGAGACCGGG	Ig g2b	for full length CDS, with stop codon	this study [J00461]
3' g1-R	cggaattcTTATTTACCAGGAGAGTGGG	Ig g1	for full length CDS, with stop codon	this study [L35037]
HA-heavy-R1	TGCAGAGACAGTGACCAGAG	Ig g2b (anti-HA heavy chain)	for reverse transcription, prior to 5' RACE	this study
HA-heavy-R2	ACTACCACCCCTACTAATAG	Ig g2b (anti-HA heavy chain)	for 5' RACE reverse primer	this study
Myc-heavy-R1	GAGTAATAGTAGGTATTACC	Ig g1 (anti-Myc heavy chain)	for reverse transcription, prior to 5' RACE	this study
Myc-heavy-R2	GGGTGTAAGTACCACGACTA	Ig g1 (anti-Myc heavy chain)	for 5' RACE reverse primer	this study
HH-Bam-F	cgggatcCACCATGAACTTCGGGCTCAG	Ig g2b (anti-HA heavy chain)	for full length CDS, with the Kozak sequence	this study
MH-Bam-F	cgggatccaccATGAACTTCGGGCTCAG	Ig g1 (anti-Myc heavy chain)	for full length CDS, with the Kozak sequence	this study
5' k-F	cgggatccGAYATTGTGMTSACMCARWCTMCA	Ig k	degenerate primer at variable region	Wang et al. (2000)
3' k-R	cggaattcCTAACACTCATTCCTGTTGA	Ig k	for full length CDS, with stop codon	this study [BC080787]
HA-light-R1	TTCACTGCCATCAATCTTCC	Ig k (anti-HA light chain)	for reverse transcription prior to 5' RACE	this study
HA-light-R2	TCAACAGTTTAGGAGGCTGC	Ig k (anti-HA light chain)	for 5' RACE reverse primer	this study
Myc-light-R1	CTCATGCTGTAGGTGCTGTC	Ig k (anti-Myc light chain)	for reverse transcription prior to 5' RACE	this study
Myc-light-R2	AGTTTGGGTGGCTGTCCTGG	Ig k (anti-Myc light chain)	for 5' RACE reverse primer	this study
HL-bam-F	cgggatccaccATGGAATCACAGACTCAGGTC	Ig k (anti-HA light chain)	for full length CDS, with the Kozak sequence	this study
ML-Bgl-F	ggaagatctccaccATGGAGAAAGACACACTCCTG	Ig k (anti-Myc light chain)	for full length CDS, with the Kozak sequence	this study
HSPst-G10 anchor	cggaagcttgtcgactgcagacGGGIIGGGIIGGGIIG		for 5' RACE dsDNA synthesis	Min K. Park, personal communication
HSPst adaptor	CGGAAGCTTGTCGACTGCAGAC		for 5' RACE forward primer	Min K. Park, personal communication
Upper cases indicate sequences complementary to the templates. Lower cases indicate adapter or linker sequences.
