# Supplementary figures and images for: Quantitative analyses reveal extracellular dynamics of Wnt ligands in Xenopus embryos
Source: eLife journal article supplement (doi:10.7554/elife.55108), 2021-04-27

Figure 4-Figure Supplement 2 (Mii et al.)

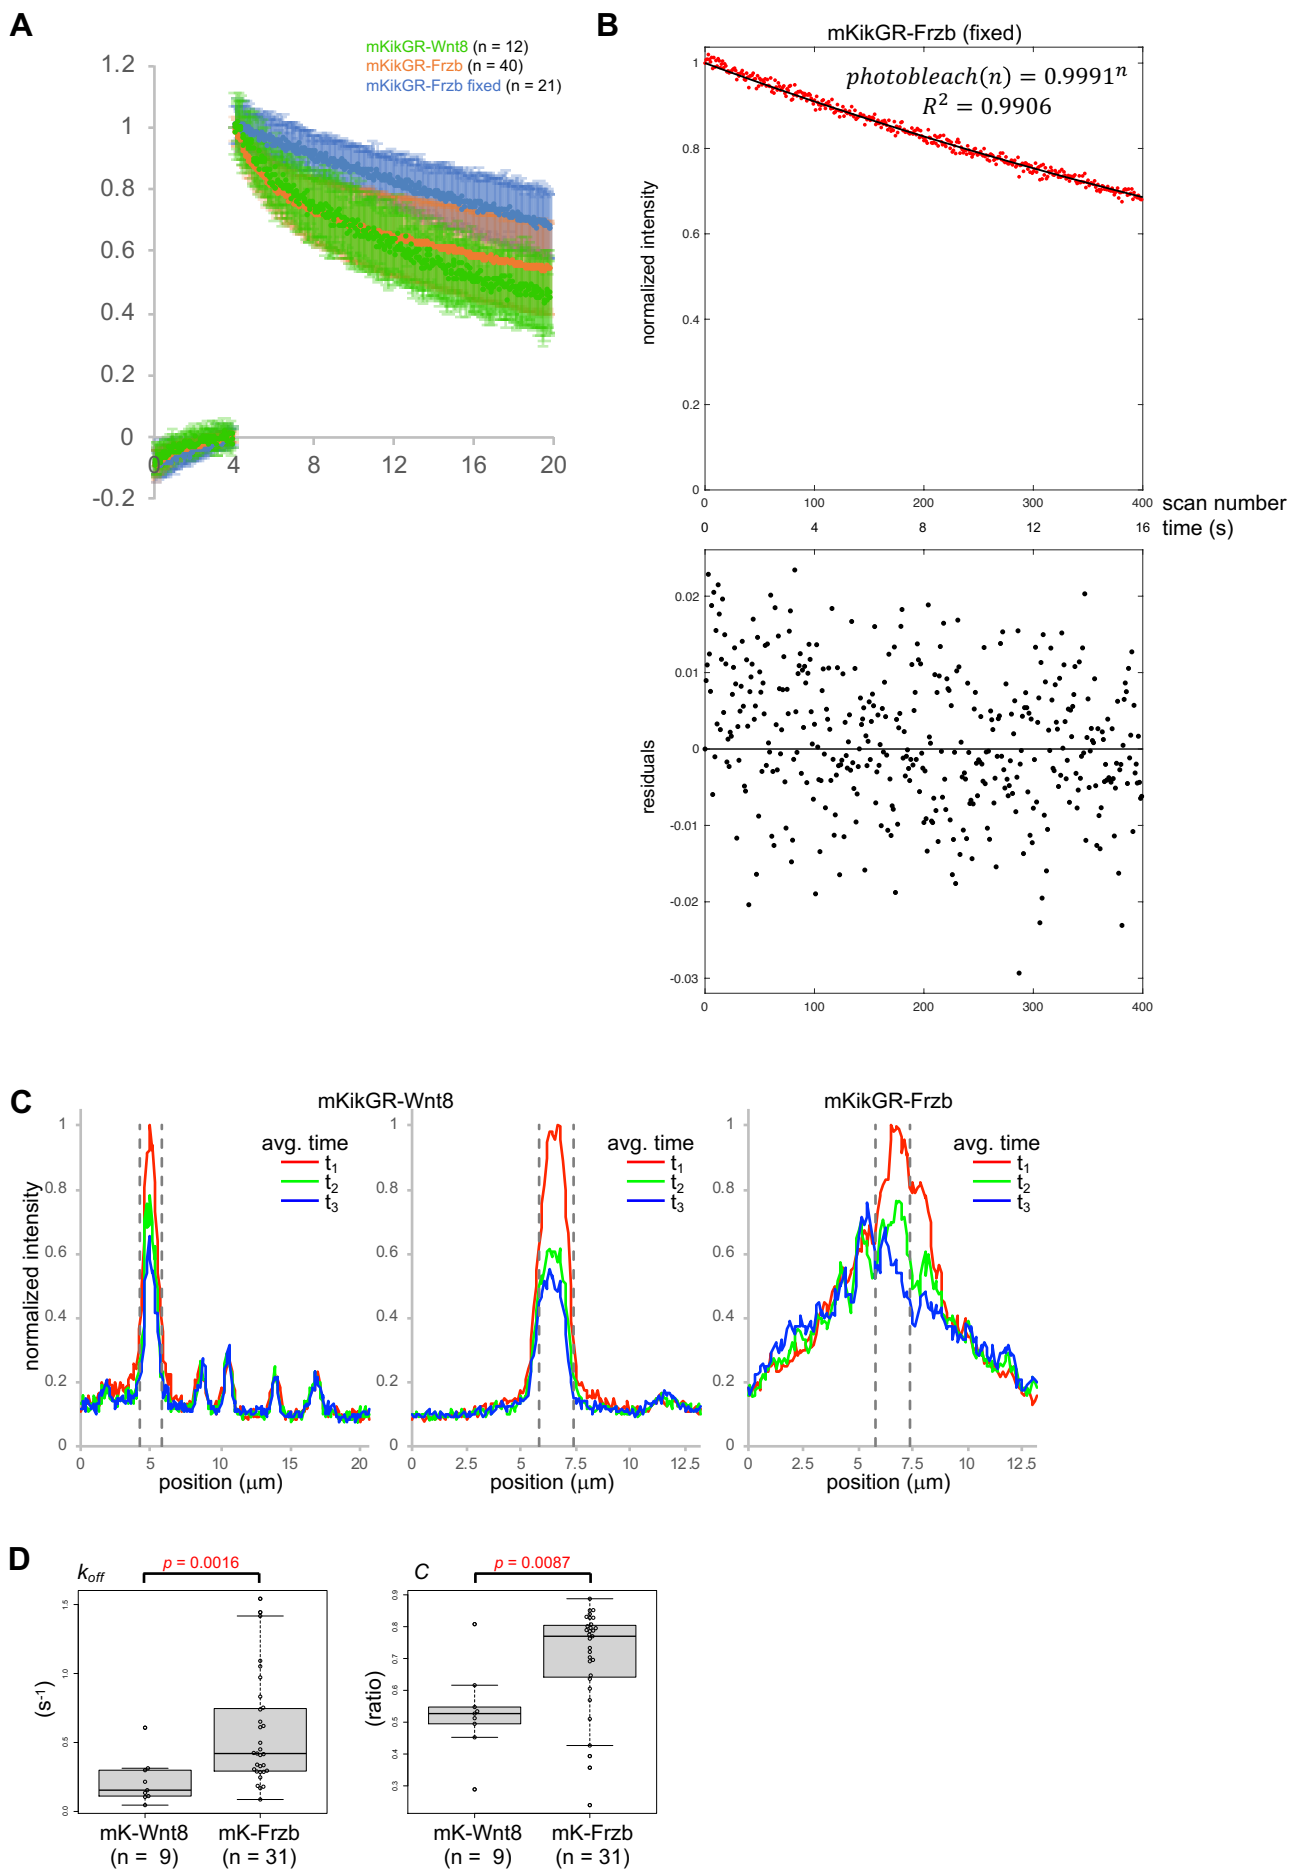

Supplement: supp [file elife-55108-supp-v1.zip]

Figure 1-Figure Supplement 2 (Mii et al.)

**A**

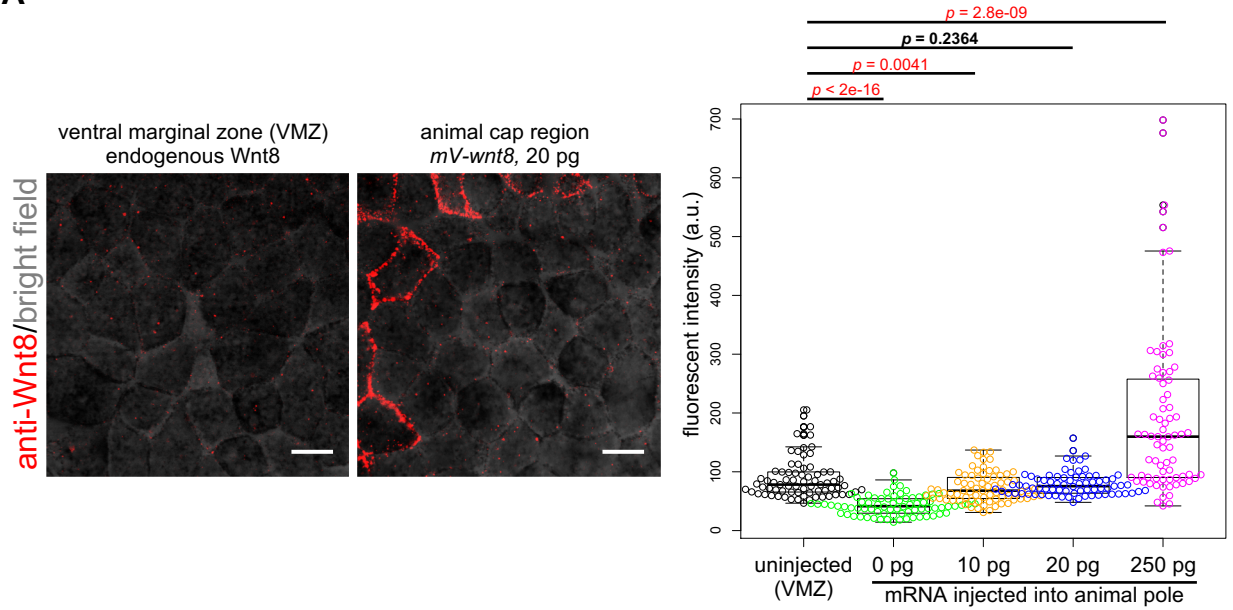

**B**

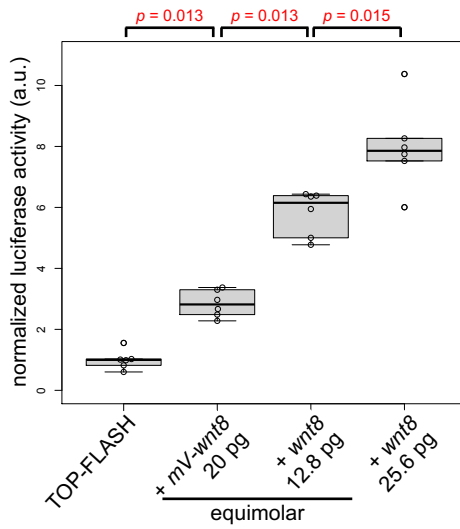

**C**

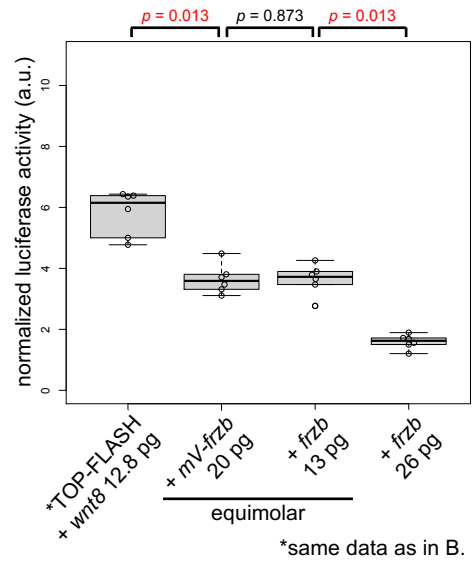

\*same data as in B.

Supplement: supp [file elife-55108-supp-v1.zip]

Figure 3-Figure Supplement 2 (Mii et al.)

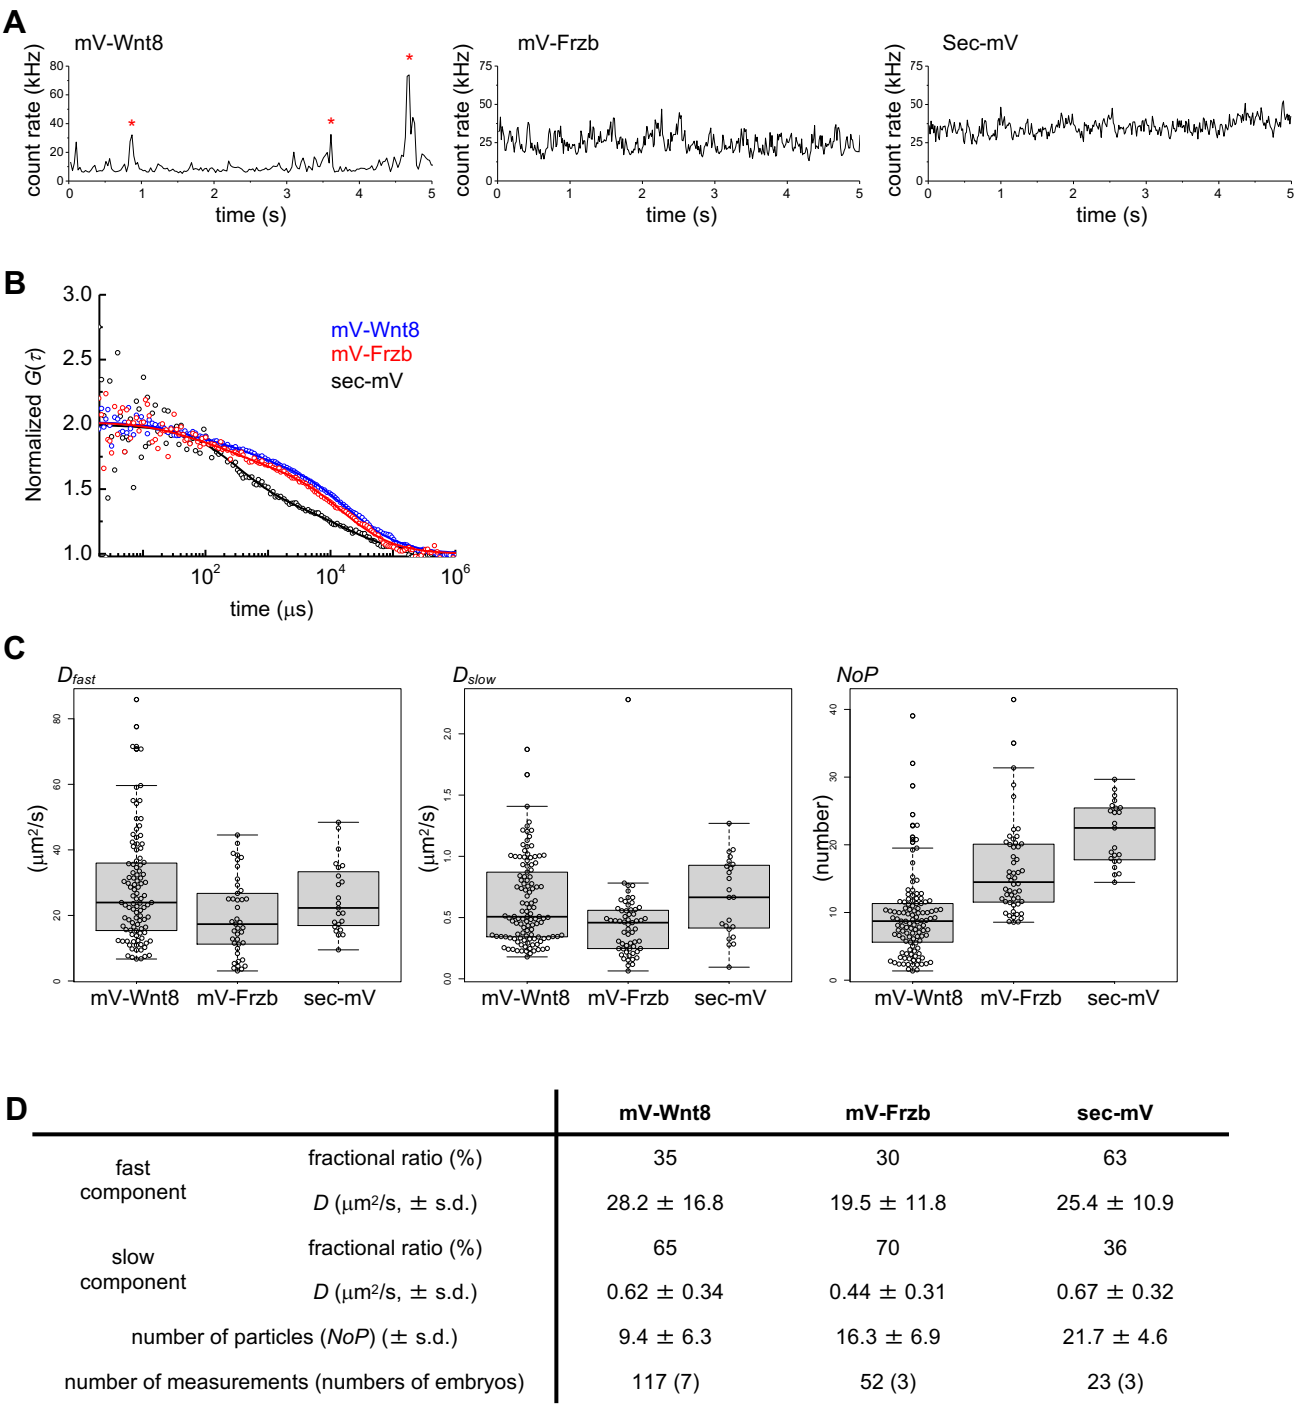

Supplement: supp [file elife-55108-supp-v1.zip]

Figure 5-Figure Supplement 1 (Mii et al.)

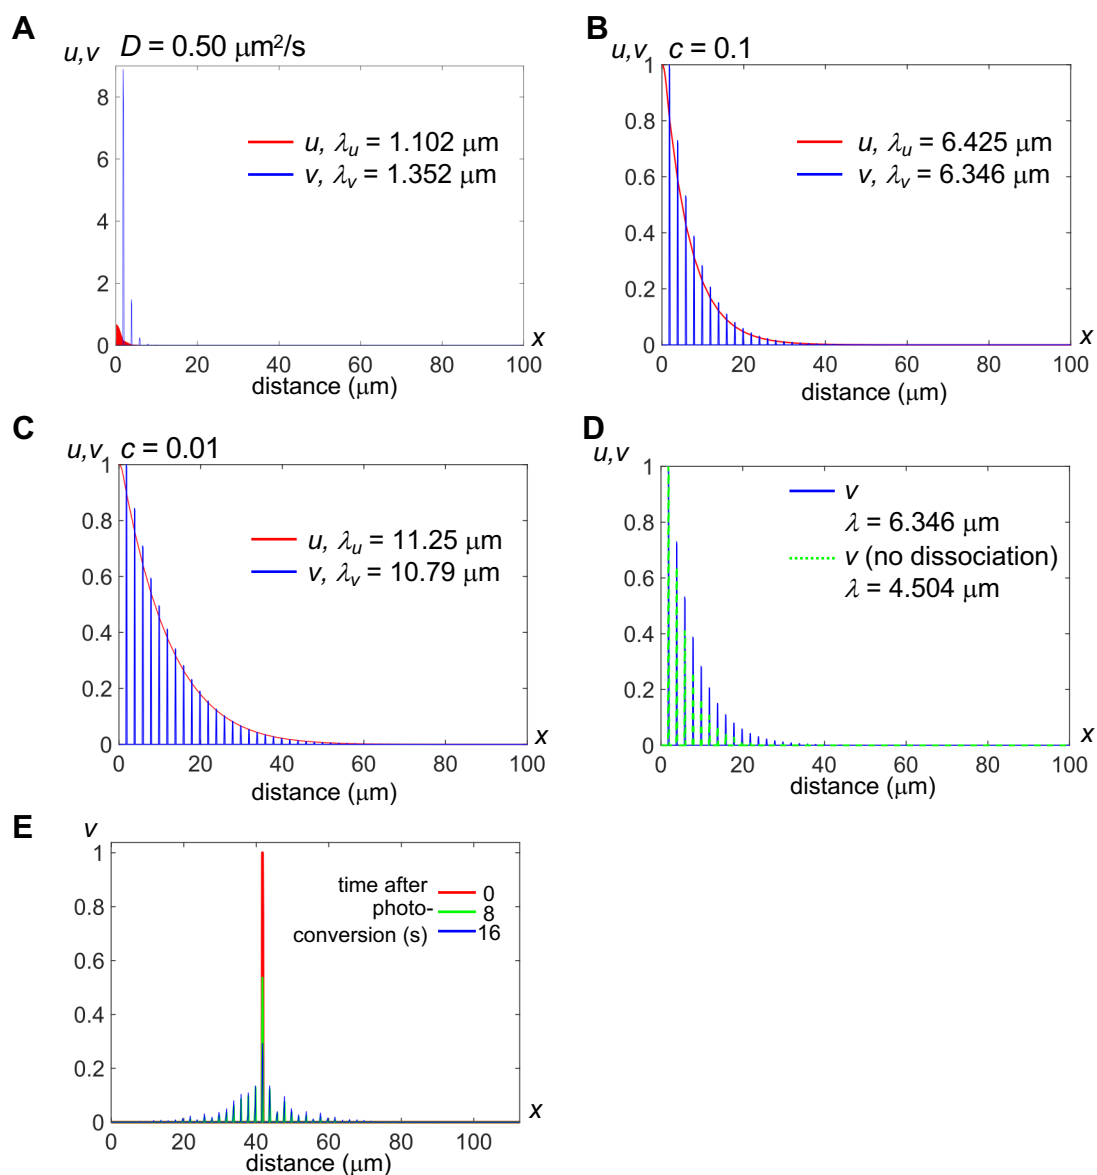

Supplement: supp [file elife-55108-supp-v1.zip]

Figure 2-Figure Supplement 1 (Mii et al.)

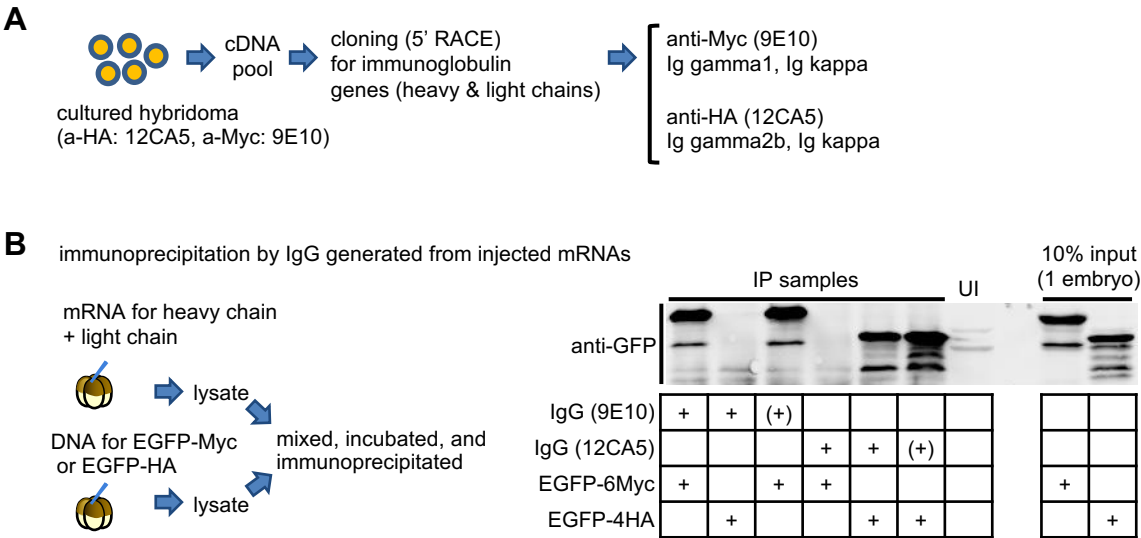

Supplement: supp [file elife-55108-supp-v1.zip]

Figure 4-Figure Supplement 1 (Mii et al.)

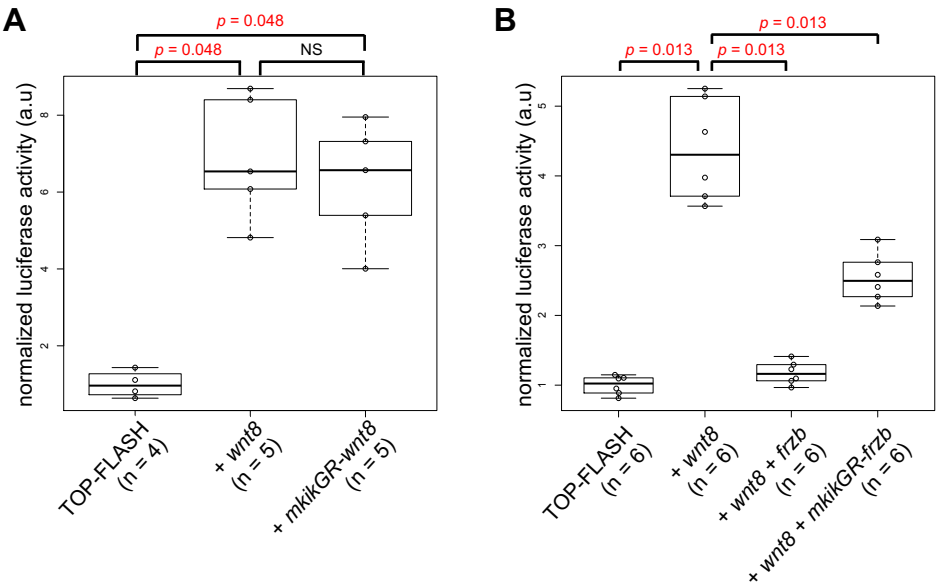

Supplement: supp [file elife-55108-supp-v1.zip]

Figure 1-Figure Supplement 1 (Mii et al.)

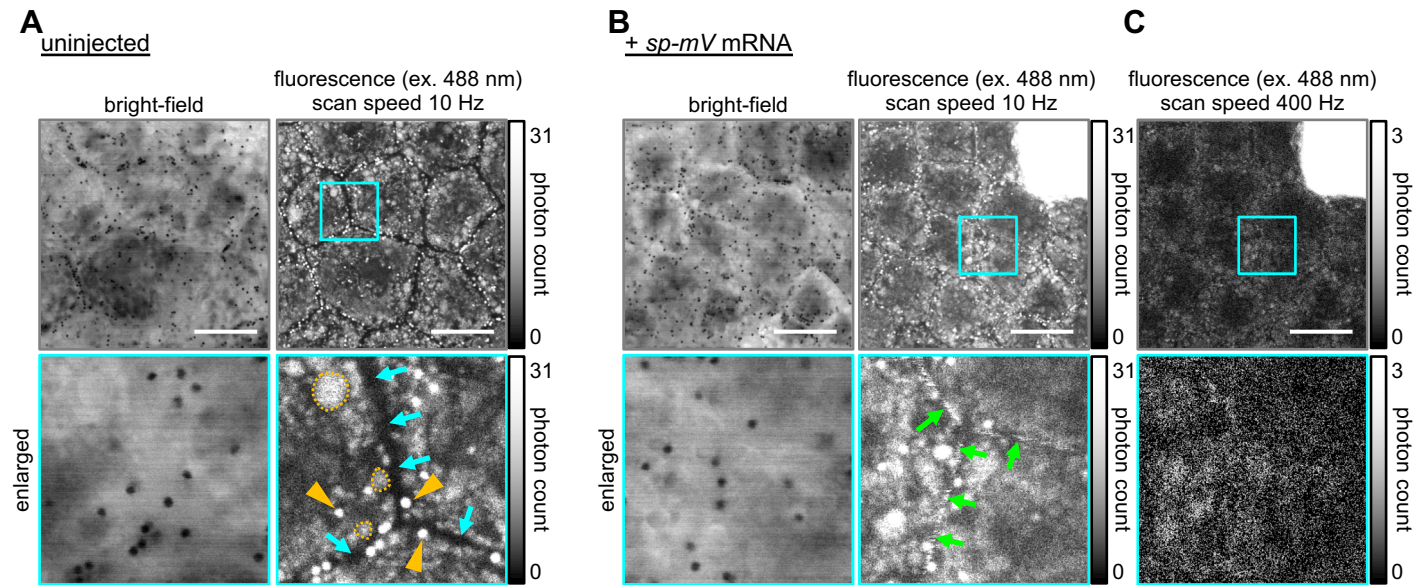

Supplement: supp [file elife-55108-supp-v1.zip]

Figure 3-Figure Supplement 3 (Mii et al.)

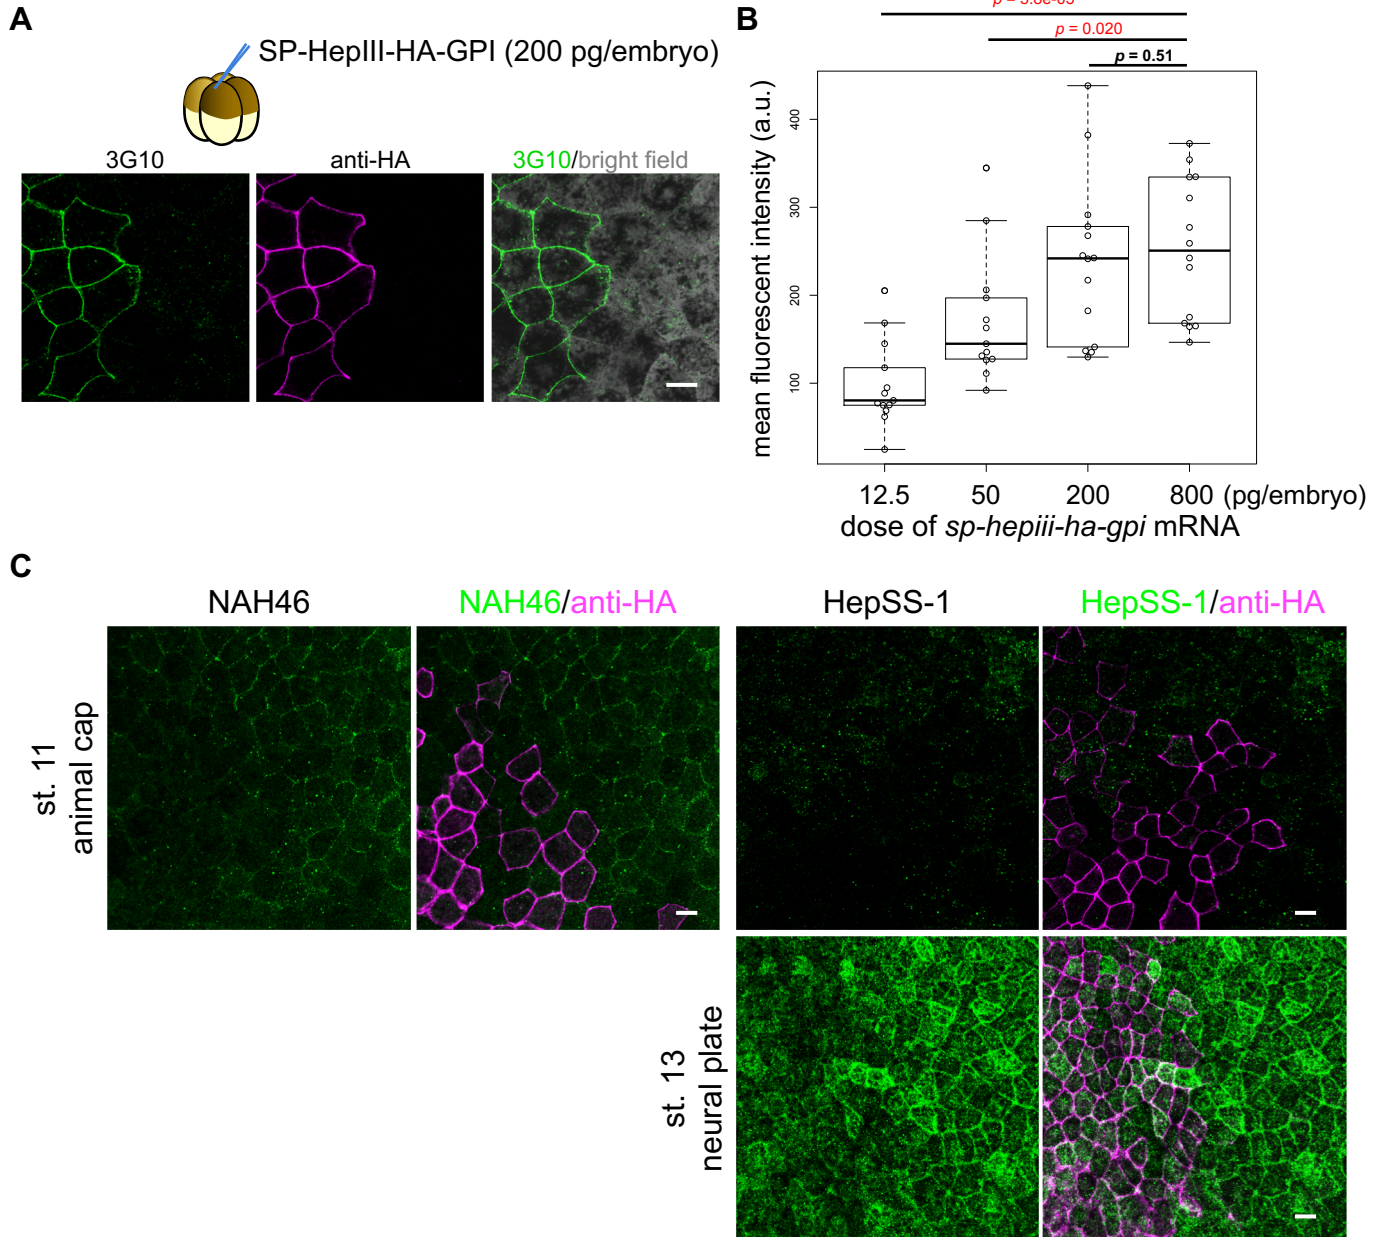

Supplement: supp [file elife-55108-supp-v1.zip]

Figure 4-Figure Supplement 3 (Mii et al.)

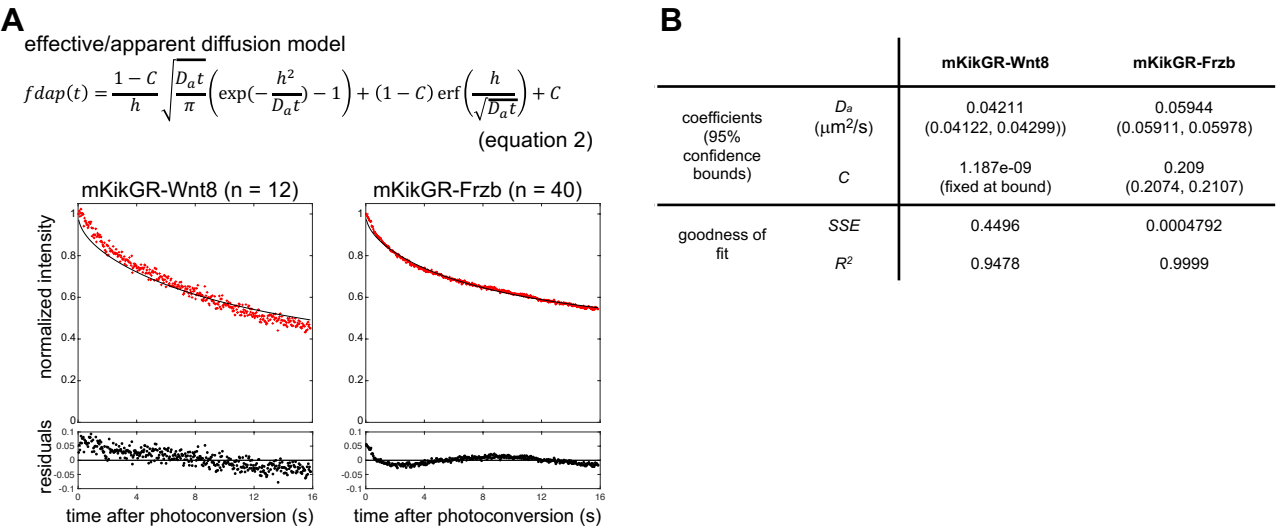

Supplement: supp [file elife-55108-supp-v1.zip]
